# Supplementary material for: Between global risk reduction goals, scientific-technical capabilities and local realities: a novel modular approach for multi-risk assessment
Source: Copernicus journal article supplement (doi:10.5194/nhess-2023-142), 2023-11-02
Supplement: Supplementary file 1 [file nhess-2023-142-supplement.pdf]

## Supplement of

# Between global risk reduction goals, scientific-technical capabilities and local realities: a novel modular approach for multi-risk assessment

5 Elisabeth Schoepfer et al.

*Correspondence to:* Elisabeth Schoepfer (elisabeth.schoepfer@dlr.de)

The supplement shows examples of the questionnaires that were used to obtain user feedback on the demonstrator for a multi-risk information system during several feedback iterations: (1) a questionnaire for a quick assessment during workshops and (2) a questionnaire for a detailed assessment for users who tested the demonstrator in a hands-on session or without guidance over a period of time. Both versions of the questionnaires have been modified slightly over time to address emerging issues. The versions shown here are those used in the third year of the development process.

### Questionnaire (V2.0, year 3) – Quick assessment during workshops

15 **Translated English version**

RIESGOS: Evaluation from the perspective of users / actors in the partner country

|                            |                                                                                                                                | Not at all            | Very less             | Less                  | Mod-erately           | Highly                | Very highly           | Totally               |
|----------------------------|--------------------------------------------------------------------------------------------------------------------------------|-----------------------|-----------------------|-----------------------|-----------------------|-----------------------|-----------------------|-----------------------|
| <b>Information content</b> | How <b>comprehensible</b> is the information presented in the demonstrator?                                                    | <input type="radio"/> |
|                            | How high is the <b>added value of the information</b> compared to existing information systems?                                | <input type="radio"/> |
|                            | Data and results always include a level of uncertainty. Do you think it is important to visualise these <b>uncertainties</b> ? | <input type="radio"/> |

|                           |                                                                                                                                                  |                       |                       |                       |                       |                       |                       |                       |
|---------------------------|--------------------------------------------------------------------------------------------------------------------------------------------------|-----------------------|-----------------------|-----------------------|-----------------------|-----------------------|-----------------------|-----------------------|
| User interface            | How familiar are you with the <b>use of geographic information systems</b> ?                                                                     | <input type="radio"/> |
|                           | How much do you like the overall <b>design of the user interface</b> ?                                                                           | <input type="radio"/> |
|                           | What do you think of the <b>visualisation</b> of information?                                                                                    | <input type="radio"/> |
| Usability / Applicability | How important do you consider the possibility of <b>exploring different multi-risk scenarios</b> and their impacts for risk management?          | <input type="radio"/> |
|                           | Do you consider it useful as a tool in <b>risk communication</b> to improve understanding of multi-risk situations and associated uncertainties? | <input type="radio"/> |
|                           | How useful do you consider the tool for your <b>practical work</b> ?                                                                             | <input type="radio"/> |

|                              |                                                                                                                                       | Yes                   | Maybe                 | No                    | Question not applicable |
|------------------------------|---------------------------------------------------------------------------------------------------------------------------------------|-----------------------|-----------------------|-----------------------|-------------------------|
| Future practical application | Do you think it makes sense to <b>invest in the development of the demonstrator</b> to make it fit for practical use in your country? | <input type="radio"/> | <input type="radio"/> | <input type="radio"/> | <input type="radio"/>   |
|                              | Would you be interested in integrating your data or models through your <b>own web services</b> ?                                     | <input type="radio"/> | <input type="radio"/> | <input type="radio"/> | <input type="radio"/>   |
|                              | Would you <b>actively contribute</b> to the development of an operational system for your country?                                    | <input type="radio"/> | <input type="radio"/> | <input type="radio"/> | <input type="radio"/>   |

RIESGOS: Evaluación desde la perspectiva de los usuarios / actores en el país contraparte

|                       |                                                                                                                                         | Para nada             | Muy bajo              | Bajo                  | Medio                 | Alto                  | Muy alto              | Totalmente            |
|-----------------------|-----------------------------------------------------------------------------------------------------------------------------------------|-----------------------|-----------------------|-----------------------|-----------------------|-----------------------|-----------------------|-----------------------|
| Contenido informativo | ¿Qué tan <b>comprensible</b> es la información que se demuestra en el demostrador?                                                      | <input type="radio"/> |
|                       | ¿Qué tan alto es el <b>valor agregado de la información</b> en comparación con sistemas de información existentes?                      | <input type="radio"/> |
|                       | Los datos y resultados siempre incluyen un nivel de incertidumbre. ¿Cree Ud. que es importante visualizar estas <b>incertidumbres</b> ? | <input type="radio"/> |
| Interfaz de usuario   | ¿Qué tan familiarizado está Ud. con el <b>uso de los sistemas de información geográfica</b> ?                                           | <input type="radio"/> |
|                       | ¿Cómo le gusta el <b>diseño general de la interfaz</b> de usuario?                                                                      | <input type="radio"/> |
|                       | ¿Qué le parece la <b>visualización</b> de la información?                                                                               | <input type="radio"/> |

|                             |                                                                                                                                                                             |                       |                       |                       |                       |                       |                       |                       |
|-----------------------------|-----------------------------------------------------------------------------------------------------------------------------------------------------------------------------|-----------------------|-----------------------|-----------------------|-----------------------|-----------------------|-----------------------|-----------------------|
| Utilidad /<br>Aplicabilidad | ¿Qué tan importante considera la posibilidad de <b>explorar diferentes escenarios multi-riesgo</b> y sus impactos para la gestión de riesgos?                               | <input type="radio"/> |
|                             | ¿Cómo considera la utilidad como herramienta en la <b>comunicación de riesgos</b> para mejorar el entendimiento de situaciones multi-riesgo y las incertidumbres asociadas? | <input type="radio"/> |
|                             | ¿Cómo considera la utilidad de la herramienta para <b>su trabajo práctico</b> ?                                                                                             | <input type="radio"/> |

|                            |                                                                                                                              | Si                    | Tal vez               | No                    | Pregunta no aplicable |
|----------------------------|------------------------------------------------------------------------------------------------------------------------------|-----------------------|-----------------------|-----------------------|-----------------------|
| Aplicación práctica futura | ¿Cree que tiene sentido <b>invertir en el desarrollo del demostrador</b> para que esté apto para su uso práctico en su país? | <input type="radio"/> | <input type="radio"/> | <input type="radio"/> | <input type="radio"/> |
|                            | ¿Estaría interesado en integrar sus datos o modelos a través de sus <b>propios servicios web</b> ?                           | <input type="radio"/> | <input type="radio"/> | <input type="radio"/> | <input type="radio"/> |
|                            | ¿Usted <b>contribuiría activamente</b> al desarrollo de un sistema operacional para su país?                                 | <input type="radio"/> | <input type="radio"/> | <input type="radio"/> | <input type="radio"/> |

## Questionnaire (V2.0, year 3) – Detailed assessment during practical hands-on sessions

### Translated English version

#### Your feedback on the RIESGOS demonstrator

30 Please share your experience with us through this survey.

About this survey:

You had the opportunity to test the demonstrator - thank you very much for your active participation! Now we would like to know what we can do to make the demonstrator even more useful and user-friendly. For this purpose, we have developed a questionnaire

35 that addresses seven topics:

1. Your profile: data and work experience
2. Information content of the demonstrator
3. Usefulness / applicability of the demonstrator
4. User interface of the demonstrator
- 40 5. Demonstrator usability
6. Your overall satisfaction with the demonstrator
7. Towards a future practical application in your country

We would be grateful if you could take the time to answer these questions. This should not take more than 15-20 minutes. The evaluation of the answers is anonymous. The RIESGOS team is looking forward to your answers and will take them into account

45 in the future development of the demonstrator.

## Your profile

|                                                   |                                                       |                                           |                                                                         |                                                   |                                         |                                        |                                |
|---------------------------------------------------|-------------------------------------------------------|-------------------------------------------|-------------------------------------------------------------------------|---------------------------------------------------|-----------------------------------------|----------------------------------------|--------------------------------|
| In what field do you work?                        |                                                       |                                           |                                                                         |                                                   |                                         |                                        |                                |
| Field:                                            | <input type="checkbox"/> Risk and disaster management | <input type="checkbox"/> Spatial planning | <input type="checkbox"/> Infrastructure (electricity, water, transport) | <input type="checkbox"/> Research and development | <input type="checkbox"/> Private sector | <input type="checkbox"/> Public sector | <input type="checkbox"/> Other |
| On which organisational level do you work?        |                                                       |                                           |                                                                         |                                                   |                                         |                                        |                                |
| Organisational level:                             | <input type="checkbox"/> Political                    | <input type="checkbox"/> Management       | <input type="checkbox"/> Operational                                    | <input type="checkbox"/> Technical / Engineering  | <input type="checkbox"/> Administration | <input type="checkbox"/> Research      | <input type="checkbox"/> Other |
| In which geographical context do you mainly work? |                                                       |                                           |                                                                         |                                                   |                                         |                                        |                                |
| Spatial / geographical level:                     | <input type="checkbox"/> National                     | <input type="checkbox"/> Regional         | <input type="checkbox"/> Local                                          | <input type="checkbox"/> Not applicable           |                                         |                                        |                                |

## Information content of the demonstrator

|   |                                                                  | Yes                   | Partly                | No                    | Not applicable        |
|---|------------------------------------------------------------------|-----------------------|-----------------------|-----------------------|-----------------------|
| 1 | Is the information displayed <b>comprehensible</b> ?             | <input type="radio"/> | <input type="radio"/> | <input type="radio"/> | <input type="radio"/> |
| 2 | If not, please specify what you did not understand.              |                       |                       |                       |                       |
| 3 | Is the information shown <b>relevant</b> to multi-risk analysis? | <input type="radio"/> | <input type="radio"/> | <input type="radio"/> | <input type="radio"/> |
| 4 | Did you have access to the information you expected to receive?  | <input type="radio"/> | <input type="radio"/> | <input type="radio"/> | <input type="radio"/> |
| 5 | What kind of information is missing?                             |                       |                       |                       |                       |
| 6 | Do you think the information shown is reasonable?                | <input type="radio"/> | <input type="radio"/> | <input type="radio"/> | <input type="radio"/> |
| 7 | If not, what did you find unreasonable?                          |                       |                       |                       |                       |

|    |                                                                                                                                                                                                                                                                                                                                                                                                                                                                                        |                       |                       |                       |                       |
|----|----------------------------------------------------------------------------------------------------------------------------------------------------------------------------------------------------------------------------------------------------------------------------------------------------------------------------------------------------------------------------------------------------------------------------------------------------------------------------------------|-----------------------|-----------------------|-----------------------|-----------------------|
| 8  | Uncertainties have different causes. On the one hand, they arise due to the simplified representation of complex natural processes by models. On the other hand, these models often do not sufficiently consider the spatial and temporal heterogeneity of the natural processes to be represented. Other uncertainties may result from measurement and estimation errors in the recording of model parameters. Do you think it is important to visualise these <b>uncertainties</b> ? | <input type="radio"/> | <input type="radio"/> | <input type="radio"/> | <input type="radio"/> |
| 9  | Do you have <b>visualization techniques of uncertainty</b> in mind that you are used to?                                                                                                                                                                                                                                                                                                                                                                                               | <input type="radio"/> | <input type="radio"/> | <input type="radio"/> | <input type="radio"/> |
| 10 | Could you give any examples?                                                                                                                                                                                                                                                                                                                                                                                                                                                           |                       |                       |                       |                       |

50

### Utility / Potential Applicability

|    |                                                                                                                                                                                      | Yes                   | Partly                | No                    | Not applicable        |
|----|--------------------------------------------------------------------------------------------------------------------------------------------------------------------------------------|-----------------------|-----------------------|-----------------------|-----------------------|
| 11 | Do you see a potential for using the demonstrator for your <b>practical work</b> ?                                                                                                   | <input type="radio"/> | <input type="radio"/> | <input type="radio"/> | <input type="radio"/> |
| 12 | Is the <b>added value of the information</b> significant compared to existing information systems?                                                                                   | <input type="radio"/> | <input type="radio"/> | <input type="radio"/> | <input type="radio"/> |
| 13 | Do you think the demonstrator could be used for <b>spatial planning</b> in the future?                                                                                               | <input type="radio"/> | <input type="radio"/> | <input type="radio"/> | <input type="radio"/> |
| 14 | Do you see a future application of the demonstrator for <b>civil protection/risk management</b> ?                                                                                    | <input type="radio"/> | <input type="radio"/> | <input type="radio"/> | <input type="radio"/> |
| 15 | Do you think you could use the demonstrator in <b>risk communication</b> in the future to improve understanding of multi-risk situations and the uncertainties associated with them? | <input type="radio"/> | <input type="radio"/> | <input type="radio"/> | <input type="radio"/> |
| 16 | Do you see a potential for your <b>organisation's data</b> to be displayed and used in the demonstrator?                                                                             | <input type="radio"/> | <input type="radio"/> | <input type="radio"/> | <input type="radio"/> |
| 17 | If so, what data could be displayed?                                                                                                                                                 |                       |                       |                       |                       |

## Graphical User Interface

|    |                                                                                                                                                                                                    | Yes                   | Partly                | No                    | Not applicable        |
|----|----------------------------------------------------------------------------------------------------------------------------------------------------------------------------------------------------|-----------------------|-----------------------|-----------------------|-----------------------|
| 18 | The purpose of the demonstrator is to allow users to study the effects of multiple natural hazards and how they interact with each other. Is the <b>workflow</b> provided useful for this purpose? | <input type="radio"/> | <input type="radio"/> | <input type="radio"/> | <input type="radio"/> |
| 19 | If not, what needs to be improved?                                                                                                                                                                 |                       |                       |                       |                       |
| 20 | Do you like the <b>visualisation</b> of the information displayed?                                                                                                                                 | <input type="radio"/> | <input type="radio"/> | <input type="radio"/> | <input type="radio"/> |
| 21 | If so, which visualisations did you particularly like?                                                                                                                                             |                       |                       |                       |                       |
| 22 | Which visualisations did you not like?                                                                                                                                                             |                       |                       |                       |                       |
| 23 | Did you use the provided layer settings (e.g. opacity, change the order of displayed products, etc.)?                                                                                              | <input type="radio"/> | <input type="radio"/> | <input type="radio"/> | <input type="radio"/> |
| 24 | If not, why did you not use the layer configuration feature?                                                                                                                                       |                       |                       |                       |                       |
| 25 | Do you like the <b>overall design of the user interface</b> ?                                                                                                                                      | <input type="radio"/> | <input type="radio"/> | <input type="radio"/> | <input type="radio"/> |
| 26 | If not, what did you not like about it?                                                                                                                                                            |                       |                       |                       |                       |
| 27 | Would you like to have more <b>flexibility in customising the personalisation</b> of the demonstrator?                                                                                             | <input type="radio"/> | <input type="radio"/> | <input type="radio"/> | <input type="radio"/> |
| 28 | If yes, in which part of the demonstrator would you like to have more flexibility?                                                                                                                 |                       |                       |                       |                       |
| 29 | Do you see the demonstrator as a <b>technological innovation</b> rather than a combination of current technologies?                                                                                | <input type="radio"/> | <input type="radio"/> | <input type="radio"/> | <input type="radio"/> |
| 30 | If not, what aspects do you consider innovative?                                                                                                                                                   |                       |                       |                       |                       |



**Usability**

|                                                                                                                 | Yes                   | Partly                | No                    | Not applicable        |
|-----------------------------------------------------------------------------------------------------------------|-----------------------|-----------------------|-----------------------|-----------------------|
| 31 Is the <b>demonstrator easy to use</b> ?                                                                     | <input type="radio"/> | <input type="radio"/> | <input type="radio"/> | <input type="radio"/> |
| 32 If not, what has caused the difficulties?                                                                    |                       |                       |                       |                       |
| 33 Have you been able to <b>follow all the steps</b> and execute all the processes of the multi-risk sequence?  | <input type="radio"/> | <input type="radio"/> | <input type="radio"/> | <input type="radio"/> |
| 34 If not, what were the problems?                                                                              |                       |                       |                       |                       |
| 35 Did you feel in good <b>control of the interaction</b> (also moving backwards and forwards in the workflow)? | <input type="radio"/> | <input type="radio"/> | <input type="radio"/> | <input type="radio"/> |
| 36 If not, what were the problems?                                                                              |                       |                       |                       |                       |
| 37 Did you <b>experience any errors</b> or receive any error messages while using the demonstrator?             | <input type="radio"/> | <input type="radio"/> | <input type="radio"/> | <input type="radio"/> |
| 38 If so, what were the errors?                                                                                 |                       |                       |                       |                       |

60

**Your overall satisfaction with the demonstrator**

|    |                        |
|----|------------------------|
| 39 | What did you like?     |
| 40 | What did you not like? |
| 41 | What was missing?      |

### Towards future practical application in your country

65 The demonstrator is a prototype that is not yet ready for application in real planning contexts. Further development for this purpose requires partner countries to integrate and validate their own data and web services. In addition, conditions must be created for the tool to be managed independently in the partner countries in the long term.

|                                                                                                                                                                                             | Yes                   | Partly                | No                    | Not applicable        |
|---------------------------------------------------------------------------------------------------------------------------------------------------------------------------------------------|-----------------------|-----------------------|-----------------------|-----------------------|
| 42 Do you think it makes sense to <b>invest in the development of the demonstrator</b> to make it fit for practical use in your country?                                                    | <input type="radio"/> | <input type="radio"/> | <input type="radio"/> | <input type="radio"/> |
| 43 Would you be interested in <b>integrating your organisation's data or models</b> through your <b>own web services</b> ?                                                                  | <input type="radio"/> | <input type="radio"/> | <input type="radio"/> | <input type="radio"/> |
| 44 If yes, what kind of data or models?                                                                                                                                                     |                       |                       |                       |                       |
| 45 If you were interested in integrating your data or models, would there be <b>technical or administrative obstacles</b> to integrating your data or models through your own web services? | <input type="radio"/> | <input type="radio"/> | <input type="radio"/> | <input type="radio"/> |
| 46 If yes, what <b>obstacles</b> do you face (i.e. technical expertise to set up a web service / does your organisation's data policy restrict the exposure of data or models)?             |                       |                       |                       |                       |
| 47 Are you interested and willing to <b>actively contribute to the development of an operational system</b> for your country?                                                               | <input type="radio"/> | <input type="radio"/> | <input type="radio"/> | <input type="radio"/> |
| 48 If so, what would your contribution be?                                                                                                                                                  |                       |                       |                       |                       |

**Thank you very much for your feedback!**

70

If you have **any specific questions** about the demonstrator or the feedback process, please feel free to send an email to:

[riesgos\[at\]dlr.de](mailto:riesgos[at]dlr.de)

More general information (brochures, fact sheets, publications, etc.) can be found on the **project website**:

75 <https://www.riesgos.de/es/>

**Original Spanish version**

80

**Su retroalimentación sobre el demostrador RIESGOS**

Por favor, comparta su experiencia con nosotros a través de este cuestionario.

Acerca de esta encuesta:

85 Usted tuvo la oportunidad de probar el demostrador. ¡Muchas gracias por su activa participación! Ahora nos gustaría saber qué podemos hacer para que el demostrador sea aún más útil y fácil de usar. Para este fin hemos desarrollado un cuestionario que aborda siete temas:

1. Su perfil: datos y experiencia laboral
2. Contenido informativo del demostrador
- 90 3. Utilidad / aplicabilidad del demostrador
4. Interfaz de usuario del demostrador
5. Usabilidad del demostrador
6. Su satisfacción general con del demostrador
7. Hacia una futura aplicación práctica en su país

95 Nos agradecería que se tomara el tiempo para responder a estas preguntas. Esto no debería llevar más de 15-20 minutos. La evaluación de las respuestas es anónima. El equipo de RIESGOS está a la espera de sus respuestas y las tendrá en cuenta en el futuro desarrollo del demostrador.

|                                                            |                                                         |                                                    |                                                                        |                                                     |                                         |                                         |                               |
|------------------------------------------------------------|---------------------------------------------------------|----------------------------------------------------|------------------------------------------------------------------------|-----------------------------------------------------|-----------------------------------------|-----------------------------------------|-------------------------------|
| ¿En qué ámbito trabaja usted?                              |                                                         |                                                    |                                                                        |                                                     |                                         |                                         |                               |
| Ámbito:                                                    | <input type="checkbox"/> Gestión de riesgos y desastres | <input type="checkbox"/> Planificación territorial | <input type="checkbox"/> Infraestructura (eléctrica, agua, transporte) | <input type="checkbox"/> Investigación y desarrollo | <input type="checkbox"/> Sector privado | <input type="checkbox"/> Sector público | <input type="checkbox"/> Otro |
| ¿En qué nivel organizativo trabaja?                        |                                                         |                                                    |                                                                        |                                                     |                                         |                                         |                               |
| Nivel de organización:                                     | <input type="checkbox"/> Político                       | <input type="checkbox"/> Gestión                   | <input type="checkbox"/> Operacional                                   | <input type="checkbox"/> Técnico / Ingeniería       | <input type="checkbox"/> Administración | <input type="checkbox"/> Investigador   | <input type="checkbox"/> Otro |
| ¿En qué contexto territorial trabaja usted principalmente? |                                                         |                                                    |                                                                        |                                                     |                                         |                                         |                               |
| Nivel espacial / territorial:                              | <input type="checkbox"/> Nacional                       | <input type="checkbox"/> Regional                  | <input type="checkbox"/> Local                                         | <input type="checkbox"/> No aplicable               |                                         |                                         |                               |

**Contenido informativo del demostrador**

|   |                                                                                                                                                            | Sí                    | En parte              | No                    | No aplicable          |
|---|------------------------------------------------------------------------------------------------------------------------------------------------------------|-----------------------|-----------------------|-----------------------|-----------------------|
| 1 | ¿Es <b>comprensible</b> la información mostrada?                                                                                                           | <input type="radio"/> | <input type="radio"/> | <input type="radio"/> | <input type="radio"/> |
| 2 | Si no, por favor especifique lo que no entendió                                                                                                            |                       |                       |                       |                       |
| 3 | ¿Es <b>relevante</b> para el análisis multi-riesgo la información mostrada?                                                                                | <input type="radio"/> | <input type="radio"/> | <input type="radio"/> | <input type="radio"/> |
| 4 | ¿Tuvo acceso a la información que esperaba recibir?                                                                                                        | <input type="radio"/> | <input type="radio"/> | <input type="radio"/> | <input type="radio"/> |
| 5 | ¿Qué tipo de información falta?                                                                                                                            |                       |                       |                       |                       |
| 6 | ¿Cree que la información mostrada es razonable?                                                                                                            | <input type="radio"/> | <input type="radio"/> | <input type="radio"/> | <input type="radio"/> |
| 7 | Si no, ¿qué no le pareció razonable?                                                                                                                       |                       |                       |                       |                       |
| 8 | Las incertidumbres tienen diferentes causas. Por un lado, surgen debido a la representación simplificada de procesos naturales complejos mediante modelos. | <input type="radio"/> | <input type="radio"/> | <input type="radio"/> | <input type="radio"/> |

|    |                                                                                                                                                                                                                                                                                                                                                                  |                       |                       |                       |                       |
|----|------------------------------------------------------------------------------------------------------------------------------------------------------------------------------------------------------------------------------------------------------------------------------------------------------------------------------------------------------------------|-----------------------|-----------------------|-----------------------|-----------------------|
|    | Por otro lado, estos modelos a menudo no tienen suficientemente en cuenta la heterogeneidad espacial y temporal de los procesos naturales que deben representarse. Otras incertidumbres pueden resultar de errores de medición y estimación en el registro de los parámetros del modelo. ¿Cree que es importante <i>visualizar</i> estas <b>incertidumbres</b> ? |                       |                       |                       |                       |
| 9  | ¿Tiene usted en mente <b>técnicas de visualización</b> de incertidumbre a las que usted está acostumbrado?                                                                                                                                                                                                                                                       | <input type="radio"/> | <input type="radio"/> | <input type="radio"/> | <input type="radio"/> |
| 10 | ¿Puede dar ejemplos de ello?                                                                                                                                                                                                                                                                                                                                     |                       |                       |                       |                       |

### Utilidad / Posible Aplicabilidad

|    |                                                                                                                                                                                                | Sí                    | En parte              | No                    | No aplicable          |
|----|------------------------------------------------------------------------------------------------------------------------------------------------------------------------------------------------|-----------------------|-----------------------|-----------------------|-----------------------|
| 11 | ¿Ve un potencial que utilice el demostrador para <b>su trabajo práctico</b> ?                                                                                                                  | <input type="radio"/> | <input type="radio"/> | <input type="radio"/> | <input type="radio"/> |
| 12 | ¿Es significativo el <b>valor agregado de la información</b> en comparación con sistemas de información existentes?                                                                            | <input type="radio"/> | <input type="radio"/> | <input type="radio"/> | <input type="radio"/> |
| 13 | ¿Considera usted que en el futuro podría aplicar el demostrador para la <b>planificación territorial</b> ?                                                                                     | <input type="radio"/> | <input type="radio"/> | <input type="radio"/> | <input type="radio"/> |
| 14 | ¿Considera usted que en el futuro podría aplicar el demostrador para la <b>protección civil/gestión de riesgos</b> ?                                                                           | <input type="radio"/> | <input type="radio"/> | <input type="radio"/> | <input type="radio"/> |
| 15 | ¿Considera usted que en el futuro podría aplicar el demostrador en la <b>comunicación de riesgos</b> para mejorar el entendimiento de situaciones multi-riesgo y las incertidumbres asociadas? | <input type="radio"/> | <input type="radio"/> | <input type="radio"/> | <input type="radio"/> |
| 16 | ¿Ve un potencial para que <b>los datos de su organización</b> sean mostrados y utilizados por el demostrador?                                                                                  | <input type="radio"/> | <input type="radio"/> | <input type="radio"/> | <input type="radio"/> |
| 17 | En caso afirmativo, ¿qué datos se podrían mostrar?                                                                                                                                             |                       |                       |                       |                       |

## Interfaz de usuario

|    |                                                                                                                                                                                                                                       | Sí                    | En parte              | No                    | No aplicable          |
|----|---------------------------------------------------------------------------------------------------------------------------------------------------------------------------------------------------------------------------------------|-----------------------|-----------------------|-----------------------|-----------------------|
| 18 | El propósito del demostrador es permitir a los usuarios explorar los impactos de múltiples amenazas naturales y cómo interactúan entre sí. ¿Le parece que el <b>flujo de trabajo</b> proporcionado tiene sentido para este propósito? | <input type="radio"/> | <input type="radio"/> | <input type="radio"/> | <input type="radio"/> |
| 19 | Si no, ¿qué se debe mejorar?                                                                                                                                                                                                          |                       |                       |                       |                       |
| 20 | ¿Le gusta la <b>visualización</b> de la información mostrada?                                                                                                                                                                         | <input type="radio"/> | <input type="radio"/> | <input type="radio"/> | <input type="radio"/> |
| 21 | En caso afirmativo, ¿qué visualizaciones le gustaron particularmente?                                                                                                                                                                 |                       |                       |                       |                       |
| 22 | ¿Qué visualizaciones no le gustaron?                                                                                                                                                                                                  |                       |                       |                       |                       |
| 23 | ¿Ha utilizado la configuración de capas proporcionada (p.ej. opacidad, cambiar el orden de los productos visualizados, etc.)?                                                                                                         | <input type="radio"/> | <input type="radio"/> | <input type="radio"/> | <input type="radio"/> |
| 24 | Si no, ¿por qué no ha utilizado la funcionalidad de la configuración de capas?                                                                                                                                                        |                       |                       |                       |                       |
| 25 | ¿Le gusta el <b>diseño general de la interfaz de usuario</b> ?                                                                                                                                                                        | <input type="radio"/> | <input type="radio"/> | <input type="radio"/> | <input type="radio"/> |
| 26 | Si no, ¿qué es lo que no le ha gustado?                                                                                                                                                                                               |                       |                       |                       |                       |
| 27 | ¿Le gustaría tener más <b>flexibilidad en la customización en la personalización</b> del demostrador?                                                                                                                                 | <input type="radio"/> | <input type="radio"/> | <input type="radio"/> | <input type="radio"/> |
| 28 | En caso afirmativo, ¿en qué parte del demostrador le gustaría tener más flexibilidad?                                                                                                                                                 |                       |                       |                       |                       |
| 29 | ¿Considera que el demostrador es una <b>innovación tecnológica</b> mucho más que una combinación de las tecnologías actuales?                                                                                                         | <input type="radio"/> | <input type="radio"/> | <input type="radio"/> | <input type="radio"/> |
| 30 | Si no, ¿qué aspectos considera innovadores?                                                                                                                                                                                           |                       |                       |                       |                       |

## Usabilidad

|    |                                                                                                                 | Sí                    | En parte              | No                    | No aplicable          |
|----|-----------------------------------------------------------------------------------------------------------------|-----------------------|-----------------------|-----------------------|-----------------------|
| 31 | ¿Es <b>fácil de usar</b> el demostrador?                                                                        | <input type="radio"/> | <input type="radio"/> | <input type="radio"/> | <input type="radio"/> |
| 32 | Si no, ¿qué ha causado las dificultades?                                                                        |                       |                       |                       |                       |
| 33 | ¿Ha podido <b>seguir todos los pasos</b> y ejecutar todos los procesos de la secuencia multi-riesgo?            | <input type="radio"/> | <input type="radio"/> | <input type="radio"/> | <input type="radio"/> |
| 34 | Si no, ¿cuáles fueron los problemas?                                                                            |                       |                       |                       |                       |
| 35 | ¿Se sintió en buen <b>control de la interacción</b> (también retrocediendo y avanzando en el flujo de trabajo)? | <input type="radio"/> | <input type="radio"/> | <input type="radio"/> | <input type="radio"/> |
| 36 | Si no, ¿cuáles fueron los problemas?                                                                            |                       |                       |                       |                       |
| 37 | ¿ <b>Experimentó algún error</b> o recibió algún mensaje de error mientras utilizaba el demostrador?            | <input type="radio"/> | <input type="radio"/> | <input type="radio"/> | <input type="radio"/> |
| 38 | En caso afirmativo, ¿cuáles fueron los errores?                                                                 |                       |                       |                       |                       |

## Su satisfacción general con el demostrador

|    |                   |  |
|----|-------------------|--|
| 39 | ¿Qué le gustó?    |  |
| 40 | ¿Qué no le gustó? |  |
| 41 | ¿Qué le faltó?    |  |

### Hacia una futura aplicación práctica en su país

El demostrador es un prototipo que todavía no está listo para su aplicación en contextos reales de planificación. Para seguir desarrollándolo para tal fin es necesario que los países asociados integren sus propios datos y servicios web y los validen. Además, deben crearse las condiciones para que la herramienta se gestione de manera independiente en los países contrapartes a largo plazo.

120

|    | Sí                                                                                                                                                                                                  | En parte | No | No aplicable |
|----|-----------------------------------------------------------------------------------------------------------------------------------------------------------------------------------------------------|----------|----|--------------|
| 42 | ¿Cree que tiene sentido <b>invertir en el desarrollo del demostrador</b> para que esté apto para su uso práctico en su país?                                                                        |          |    |              |
| 43 | ¿Estaría interesado en <b>integrar los datos o modelos</b> de su organización a través de sus <b>propios servicios web</b> ?                                                                        |          |    |              |
| 44 | En caso afirmativo, ¿qué tipo de datos o modelos?                                                                                                                                                   |          |    |              |
| 45 | En caso que estuviera interesado en integrar sus datos o modelos, ¿ <b>habría obstáculos</b> técnicos o administrativos para integrar sus datos o modelos a través de sus propios servicios web?    |          |    |              |
| 46 | En caso afirmativo, ¿qué obstáculos se enfrenta? (i.e. conocimientos técnicos para establecer un servicio web / la política de datos de su organización restringe la exposición de datos o modelos) |          |    |              |
| 47 | ¿Tiene interés y voluntad de <b>contribuir activamente al desarrollo de un sistema operacional</b> para su país?                                                                                    |          |    |              |
| 48 | En caso afirmativo, ¿cuál sería su contribución?                                                                                                                                                    |          |    |              |

¡Muchas gracias por su retroalimentación!

Si tiene **alguna pregunta específica** sobre el demostrador o el proceso de retroalimentación, no dude en enviar un correo electrónico a: [riesgos\[at\]dlr.de](mailto:riesgos[at]dlr.de)

125

En la **página web del proyecto** puede encontrar más información general (folletos, fichas, publicaciones, etc.):

<https://www.riesgos.de/es/>
